# Supplementary material for: Epidemiological Study of p16 Incidence in Head and Neck Squamous Cell Carcinoma 2005–2015 in a Representative Northern European Population
Source: MDPI journal article supplement (doi:10.3390/cancers14225717), 2022-11-21
Supplement: s1 [file s1]

**Supplement Table S1.** Five-year survival and recurrence. Recidive and residual were defined as a recurrence appearing over and under six months after end of treatment, respectively.

|                          |                     | N   | %    |
|--------------------------|---------------------|-----|------|
| Five-year survival       | Living              | 569 | 55,1 |
|                          | Died of HNSCC       | 316 | 30,6 |
|                          | Died of other cause | 148 | 14,3 |
| Recurrence in five years | No                  | 626 | 60,6 |
|                          | Residual            | 192 | 18,6 |
|                          | Recidive            | 215 | 20,8 |

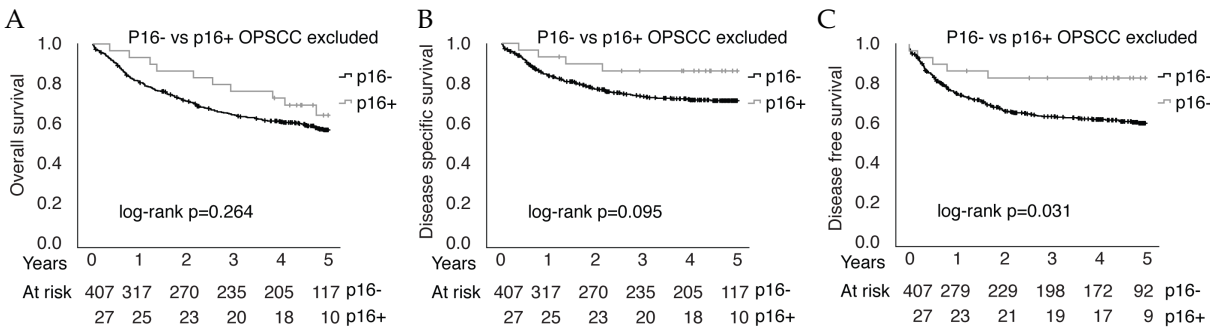

**Supplement Figure S1.** Overall survival (A), disease-specific survival (B) and disease-free survival (C) comparison between p16- and p16+ in HNSCC OPSCC patients excluded.

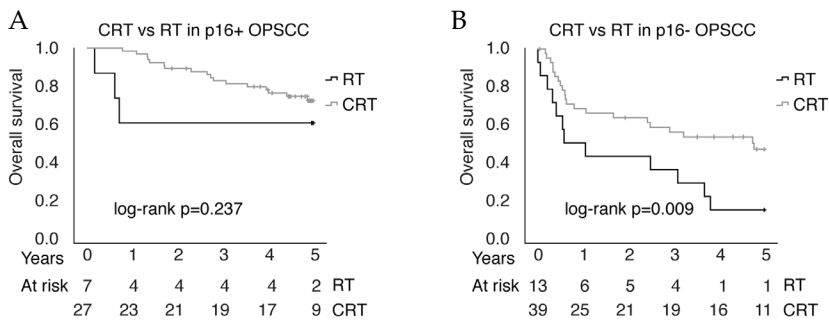

**Supplement Figure S2.** Overall survival comparison between RT and CRT treatments in p16+ (A) and p16- (B) OPSCC patients.
